# Supplementary material for: Enhanced photostability of CsPbI2Br-based perovskite solar cells through suppression of phase segregation using a zwitterionic additive
Source: Royal Society of Chemistry journal article supplement (doi:10.1039/d2se00450j), 2022-01-01
Supplement: d2se00450j1.pdf [file d2se00450j1.pdf]

## Electronic Supporting Information

### Enhanced Photostability of CsPbI<sub>2</sub>Br-based Perovskite Solar Cells through suppression of the phase segregation using a zwitterionic additive

Mikhail K. Kuznetsov,<sup>a,b</sup> Nikita A. Emelianov,<sup>a</sup> Denis V. Korchagin,<sup>a</sup> Gennady V. Shilov,<sup>a</sup> Sergey M. Aldoshin,<sup>a</sup> Pavel A. Troshin<sup>c,a</sup> and Lyubov A. Frolova,<sup>a\*</sup>

<sup>a</sup> Institute for Problems of Chemical Physics of RAS, Chernogolovka 142432, Russia

<sup>b</sup> Faculty of Fundamental Physics & Chemical Engineering, Lomonosov Moscow State University, Moscow 119991, Russia

<sup>c</sup> Silesian University of Technology, 44-100, Gliwice, Poland

Contents:

**Fig. S1.** FTIR spectrum of the D,L-asparagine powder.

**Fig. S2.** Grain size distribution for the pristine and modified CsPbI<sub>2</sub>Br films with 0.5%, 1%, and 2% **Asn** loadings.

**Fig. S3.** The evolution of the PL spectra of CsPbI<sub>2</sub>Br (a) and CsPbI<sub>2</sub>Br + 2% **Asn** (b) with increase in the laser power ( $\lambda = 450$  nm) and a double logarithmic plot of the integrated PL intensity as a function of the excitation power (c).

**Fig. S4.** A comparison of the PL-spectra of the perovskite films before and after light soaking at  $100 \pm 5$  mW/cm<sup>2</sup> and  $35 \pm 2$  °C for 2000 h for the samples with different **Asn** loadings: (a) pristine - 0%, (b) 0.5%, (c) 1%, and (d) 2%.

**Fig. S5.** A comparison of the absorption spectra of the pristine CsPbI<sub>2</sub>Br films (a) and the films with 2% **Asn** loading (b) before and after annealing at  $85 \pm 3$  °C for 150 h.

**Fig. S6.** The evolution of the power conversion efficiency (PCE) (a), open circuit voltage ( $V_{OC}$ ) (b), short circuit current density ( $J_{SC}$ ) (c), and fill factor (FF) (d) values of the devices depending on the **Asn** loading in the CsPbI<sub>2</sub>Br films.

**Fig. S7.** The evolution of the normalized open circuit voltage ( $V_{OC}$ ) (a), short circuit current ( $J_{SC}$ ) (b), and fill factor values (FF) (c) of the devices depending on the **Asn**

loading in the CsPbI<sub>2</sub>Br films during 1500 h exposure under continuous light soaking (100±5 mW/cm<sup>2</sup>, T= 35±2°C).

**Table S1.** Overview of the relevant literature data on the perovskite solar cells based on CsPbI<sub>2</sub>Br films loaded with different additives.

**Table S2.** The average and the best (in brackets) values of power conversion efficiency (*PCE*), open-circuit voltage (*V<sub>OC</sub>*), short-circuit current density (*J<sub>SC</sub>*), and fill factor (*FF*) of the devices with different **Asn** loadings.

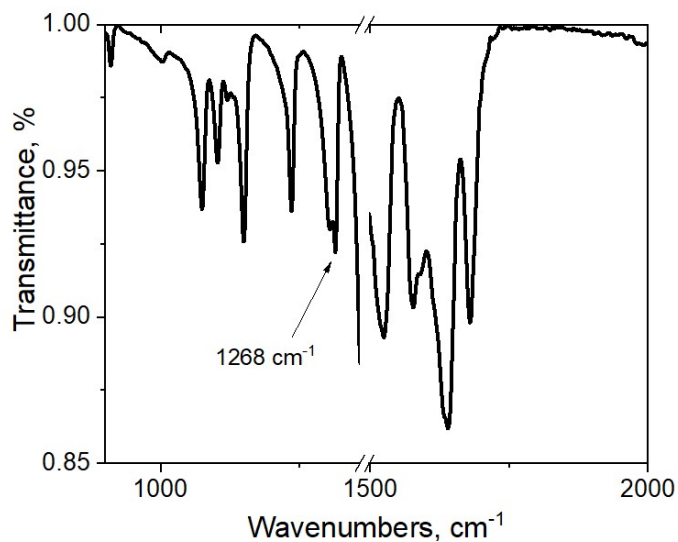

**Fig. S1.** ATR FTIR spectrum of the D,L-asparagine powder.

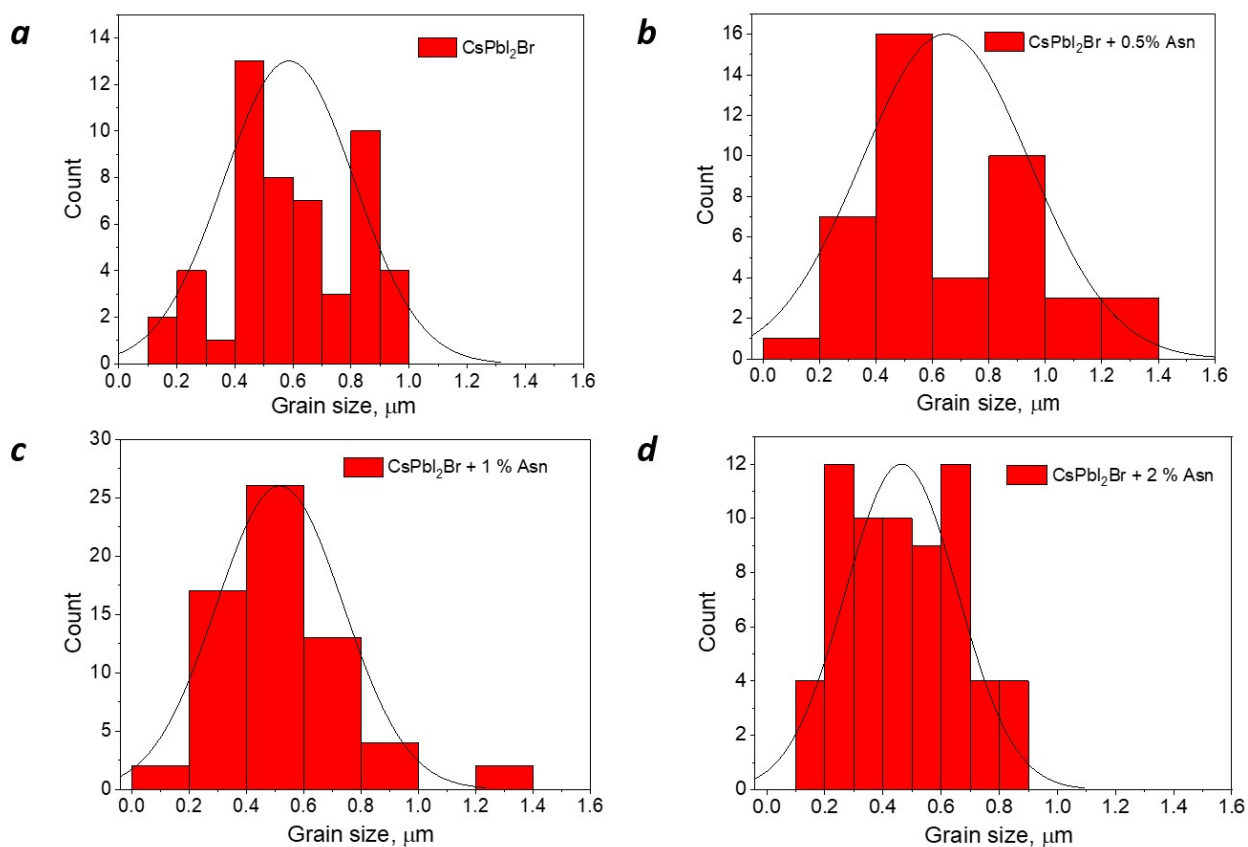

**Fig. S2.** Grain size distribution for the pristine and modified CsPbI<sub>2</sub>Br films with 0.5%, 1%, and 2% Asn loadings.

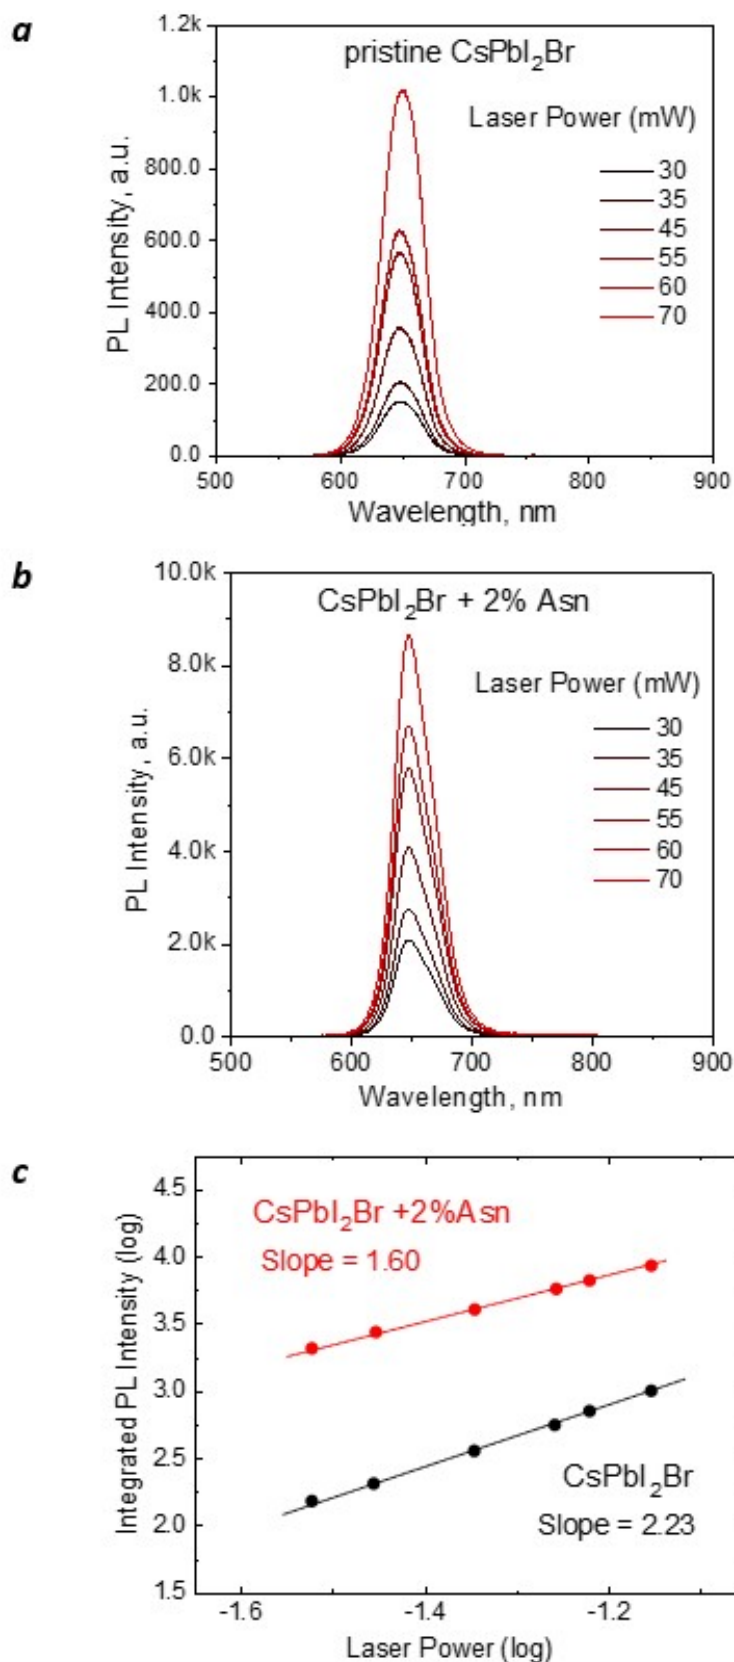

**Figure S3.** The evolution of the PL spectra of CsPbI<sub>2</sub>Br (a) and CsPbI<sub>2</sub>Br + 2% Asn (b) with increase in the laser power ( $\lambda = 450$  nm) and a double logarithmic plot of the integrated PL intensity as a function of the excitation power (c).

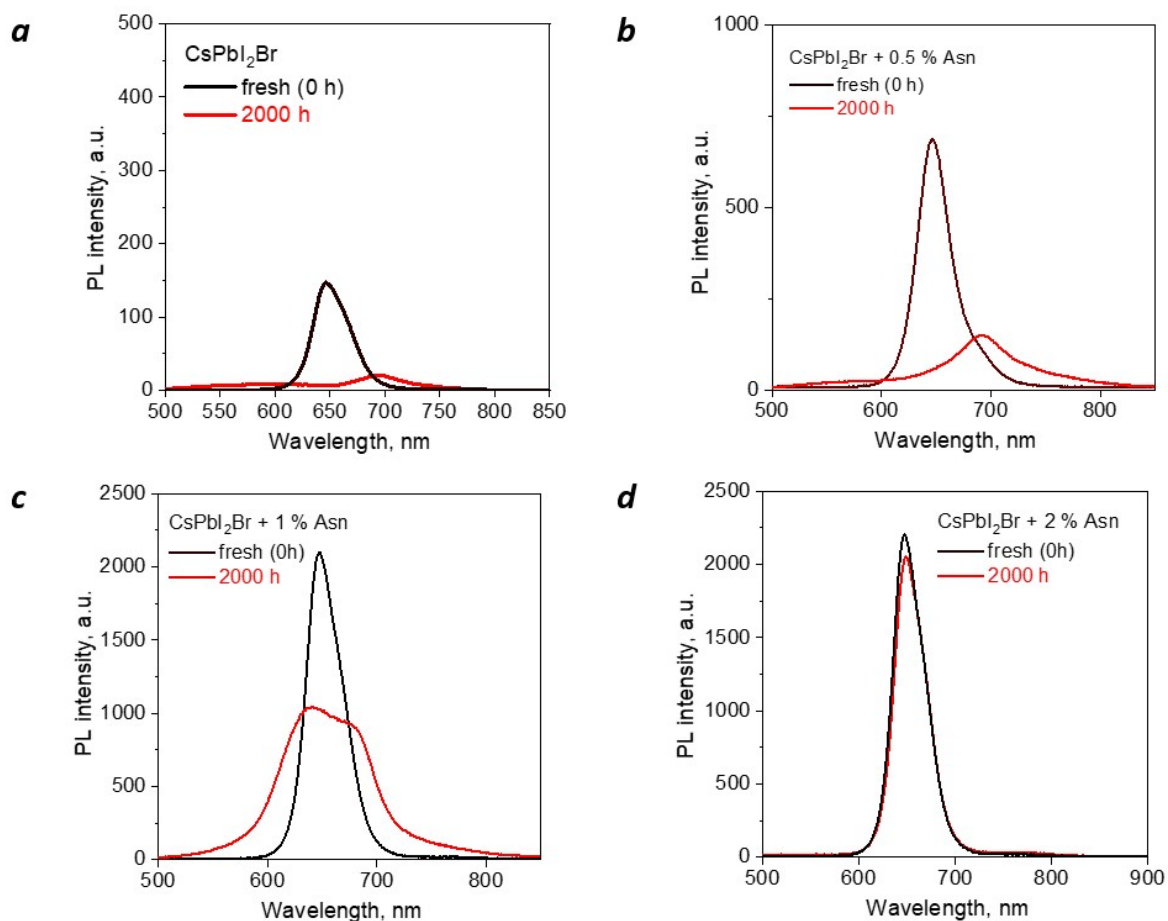

**Figure S4.** A comparison of the PL-spectra of the perovskite films before and after light soaking at  $100 \pm 5$  mW/cm<sup>2</sup> and  $35 \pm 2$  °C for 2000 h for the samples with different **Asn** loadings: (a) pristine - 0%, (b) 0.5%, (c) 1%, and (d) 2%.

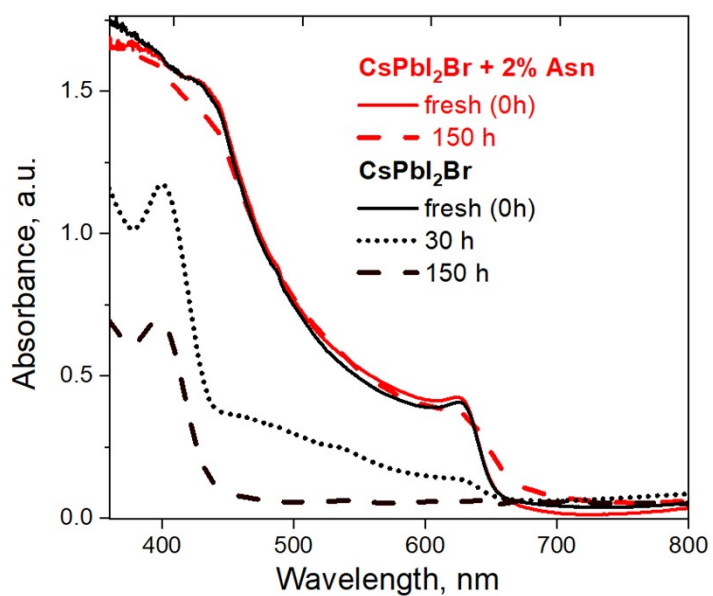

**Figure S5.** A comparison of the absorption spectra of the pristine CsPbI<sub>2</sub>Br films (a) and the films with 2% Asn loading (b) before and after annealing at  $85 \pm 3$  °C for 150 h.

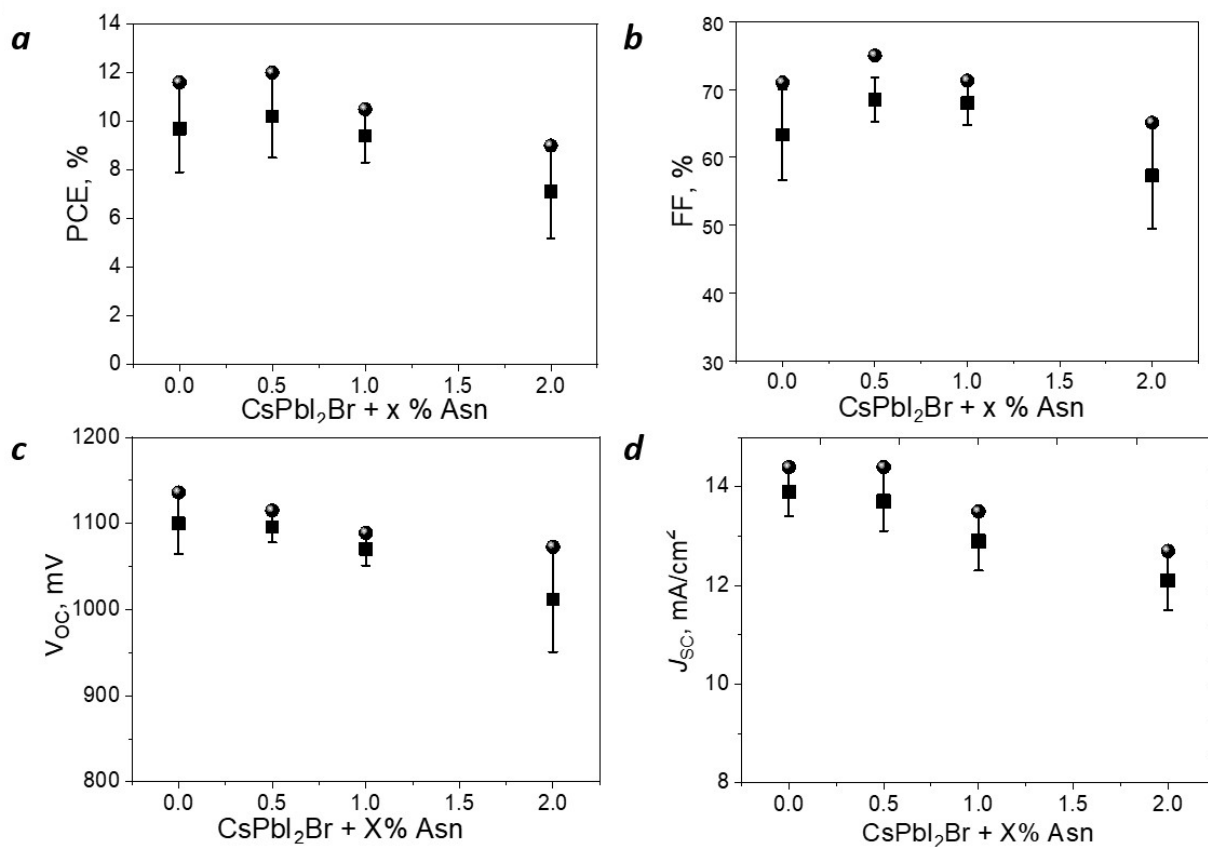

**Figure S6.** The evolution of the power conversion efficiency (PCE) (a), open circuit voltage ( $V_{oc}$ ) (b), short circuit current density ( $J_{sc}$ ) (c), and fill factor (FF) (d) values of the devices depending on the **Asn** loading in the CsPbI<sub>2</sub>Br films.

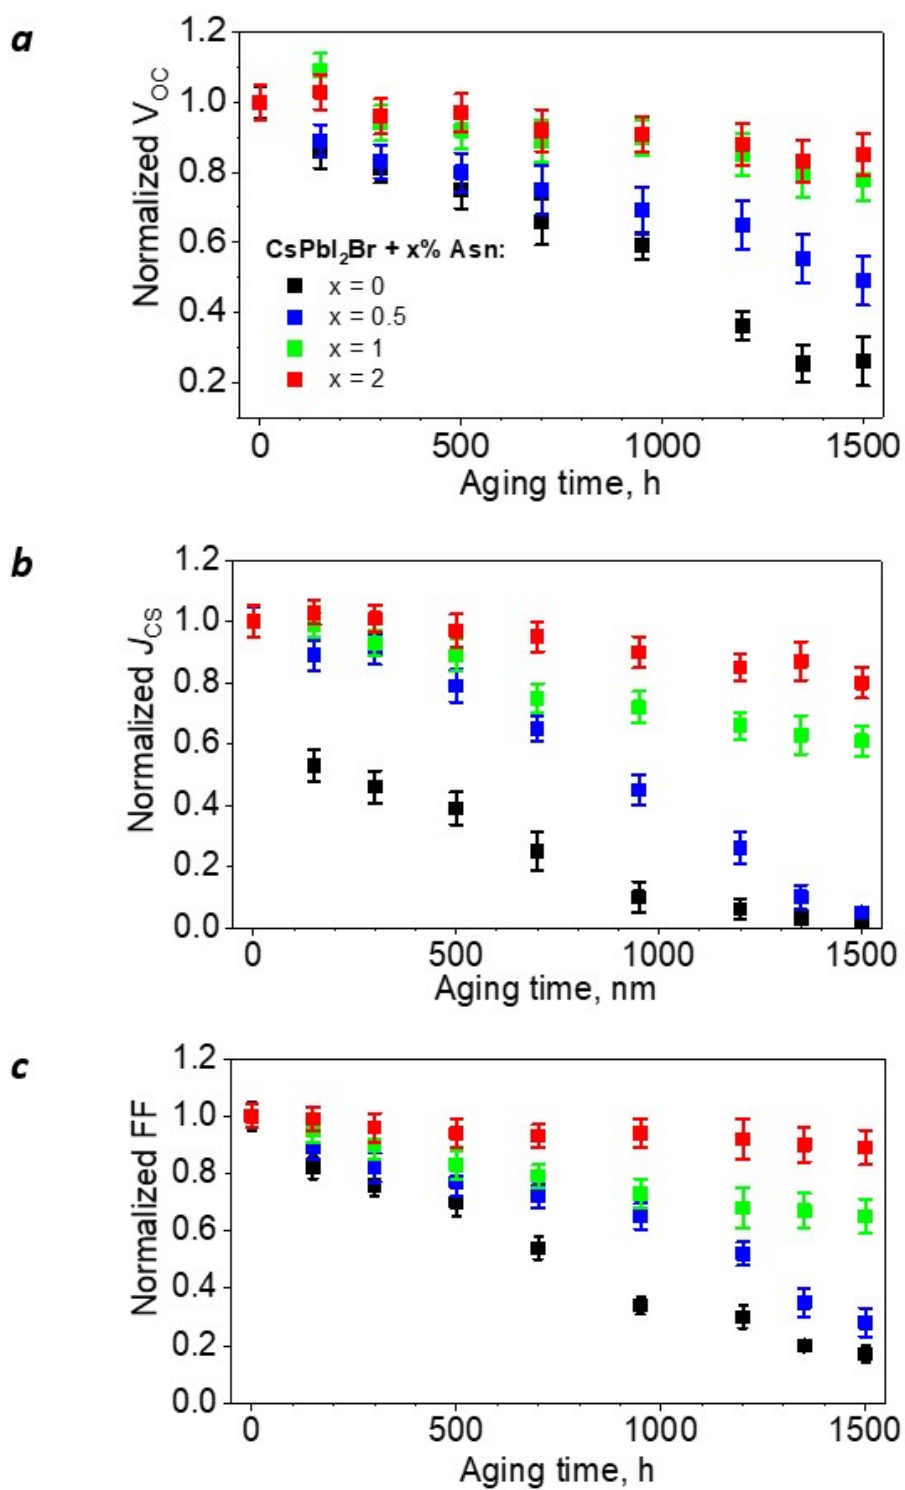

**Figure S7.** The evolution of the normalized open circuit voltage ( $V_{oc}$ ) (a), short circuit current ( $J_{sc}$ ) (b), and fill factor values (FF) (c) of the devices depending on the **Asn** loading in the CsPbI<sub>2</sub>Br films during 1500 h exposure under continuous light soaking ( $100 \pm 5$  mW/cm<sup>2</sup>,  $T = 35 \pm 2^\circ\text{C}$ ).



**Table S1.** Overview of the relevant literature data on the perovskite solar cells based on CsPbI<sub>2</sub>Br films loaded with different additives.

| Additive                                                             | PCE, % | Aging conditions                                                 | Aging time / Retained fraction (%) of the initial efficiency of PSCs | Aging time during which the films remain stable | Ref. |
|----------------------------------------------------------------------|--------|------------------------------------------------------------------|----------------------------------------------------------------------|-------------------------------------------------|------|
| 1-butyl-3-methylimidazolium tetrafluoroborate (BMIMBF <sub>4</sub> ) | 13.21% | Dark, N <sub>2</sub> atmosphere<br><br>Dark, T=30°C, RH =35 %    | 1080 h / 86.9%<br><br>500 h / ~80%                                   |                                                 | S1   |
| Methylamine acetate (MAAC)                                           | 8.7%   | Dark, RT, ambient air                                            | 168 h / 68%                                                          |                                                 | S2   |
| Phenylethylammonium bromide                                          | 16.70% | Dark, RT, inert atmosphere                                       | 1000 h / 92%                                                         |                                                 | S3   |
| CH <sub>3</sub> NH <sub>3</sub> Cl                                   | 12.9%  | Light (100 mW/cm <sup>2</sup> ), RT, RH ~30 %                    | 10 h / ~75%                                                          |                                                 | S4   |
| 2-hydroxyethyl methacrylate (HEMA)                                   | 16.13% | Dark, RT, RH=30%                                                 | 1000 h / 78%                                                         |                                                 | S5   |
| Tetrabutylammonium (TBA) iodide                                      | 11.05% | Dark, RT, ambient air                                            | 1080 h / 60 %                                                        |                                                 | S6   |
| HPbI <sub>3+x</sub> (DMA=dimethylamine)                              | 10.56% | Dark, RT, RH <20 %                                               | -                                                                    | 168 h                                           | S7   |
| HC(NH <sub>2</sub> ) <sub>2</sub> I                                  | 12.28% | Dark, RT, RH ~25-80 %                                            | 1440 h / ~100%                                                       |                                                 | S8   |
| HC(NH <sub>2</sub> ) <sub>2</sub> I (QD)                             | 14.12% | Dark, RT, RH ~20-30 %                                            | 720 h / ~85%                                                         |                                                 | S9   |
| Tetramethylammonium chloride                                         | 14.12% | Dark, RT, ambient air<br>Dark, T=85°C, N <sub>2</sub> atmosphere | 720 h / ~60%<br>168 h / ~80%                                         |                                                 | S10  |
| Cs <sub>4</sub> PbBr <sub>6</sub> <u>nanocrystals</u>                | 15.52% | Dark, RT, RH ~40 %                                               | 500 h / ~90%                                                         |                                                 | S11  |

| Additive                                                                | PCE, % | Aging conditions                                                                | Aging time / Retained fraction (%) of the initial efficiency of PSCs | Aging time during which the films remain stable | Ref. |
|-------------------------------------------------------------------------|--------|---------------------------------------------------------------------------------|----------------------------------------------------------------------|-------------------------------------------------|------|
| 5-aminovaleric acid hydrobromide (5-AVABr)                              | 16.58% | Dark, RT, ambient air<br>Dark, T=85°C, inert atmosphere                         | 1560 h / 93%<br>288 h / 80%                                          |                                                 | S12  |
| Levulinic acid (LA)                                                     | 11.68% | Dark, RT, RH ~35 %                                                              | 240 h / 50%                                                          |                                                 | S13  |
| (P3CT) carboxylated conjugated polymer                                  | 12.25% | -                                                                               | -                                                                    | -                                               | S14  |
| Sulfur-contained aminothiazolium iodide (ATI)                           | 13.91% | Dark, RT, RH ~60 %<br>Dark, T=80°C, RH=60%                                      | 12 h / 90%<br>200 h / ~90%                                           |                                                 | S15  |
| 4-chlorobenzoic acid (CBA)                                              | 14.3%  | Dark, RT, RH ~20 %                                                              | 500 h / 95%                                                          |                                                 | S16  |
| 4-bromobenzylamine (BrBeAl)                                             | 14.63% | Dark, RT, RH=60%                                                                |                                                                      | 20 min                                          | S17  |
| Pb(Ac) <sub>2</sub>                                                     | 12%    | Dark, RT, inert atmosphere                                                      | ~750 h / 90%                                                         |                                                 | S18  |
| Pb(II) propionate                                                       | 14.58% | -                                                                               | -                                                                    | -                                               | S19  |
| 1-butyl-3-methylimidazolium hexafluorophosphate (BMIMPF <sub>6</sub> ), | 16.2%  | Dark, RT, inert atmosphere<br>Dark, RT, RH=30%<br>200 thermal cycles (25–100oC) | 1200 h / 98.9%<br>1000 h / 88.6%<br>99.5%                            |                                                 | S20  |
| Guanidinium bromine (GABr)                                              | 16.97% | Dark, T=85oC, inert                                                             | 120 h / 85%                                                          |                                                 | S21  |

| <b>Additive</b>                                                               | <b>PCE, %</b> | <b>Aging conditions</b>           | <b>Aging time / Retained fraction (%) of the initial efficiency of PSCs</b> | <b>Aging time during which the films remain stable</b> | <b>Ref.</b> |
|-------------------------------------------------------------------------------|---------------|-----------------------------------|-----------------------------------------------------------------------------|--------------------------------------------------------|-------------|
|                                                                               |               | atmosphere<br>Dark, RT,<br>RH<20% | 1000 h /<br>85%                                                             |                                                        |             |
| 4-guanidinobenzoic-acid hydrochloride (4-GBACl)                               | 15.59%        | Dark, RT,<br>RH<20%               | 1200 h /<br>88%                                                             |                                                        | S22         |
| Phenethylammonium chlorine (PEACl)                                            | 15.64%        | Dark, RT,<br>RH=20%               | 1000 h /<br>87.2%                                                           |                                                        | S23         |
| 4-fluoro-phenethylammonium chlorine (F-PEACl)                                 | 16.29%        |                                   |                                                                             |                                                        |             |
| p-type molecule (BTEC-2F)                                                     | 16.25%        | Dark, RT,<br>RH=25%               | 500 h /<br>80%                                                              |                                                        | S24         |
| 4-Aminobenzoic acid (ABA)                                                     | 8.44%         |                                   |                                                                             |                                                        | S25         |
| Butylamine iodine (BAI)                                                       | 12%           | Dark, RT,<br>RH=35%               |                                                                             | 48 h                                                   | S26         |
| Biuret additive consisting of functional amino and carbonyl groups            | 13.3%         | Dark, RT,<br>RH=20%               | 1000 h /<br>~80%                                                            |                                                        | S27         |
| Polymethylmethacrylate (PMMA)                                                 | 11.18%        | Dark, RT, inert atmosphere        | ~500 h /<br>80%                                                             |                                                        | S28         |
| Polyethylene glycol (PEG)                                                     | 12.92%        | Dark, RT,<br>ambient air          | 2880 h /<br>90%                                                             |                                                        | S29         |
| Polyethylene glycol (PEG)                                                     | 13.59%        | Dark, RT, inert atmosphere        | 500 h /<br>85%                                                              |                                                        | S30         |
| Polyvinylpyrrolidone (PVP)                                                    | 10.47%        | Dark, RT,<br>RH=50-60%            |                                                                             | 96 h                                                   | S31         |
| Poly(N-alkyldiketopyrrolo-pyrrole dithienylthieno[3,2-b]thio-phene) (DPP-DTT) | 15.14%        | Dark, T=85°C,<br>inert atmosphere | 600 h /<br>90%                                                              |                                                        | S32         |
|                                                                               |               | Dark, RT,                         | ~530 h /<br>~96%                                                            |                                                        |             |

| Additive                                           | PCE, %  | Aging conditions                                      | Aging time / Retained fraction (%) of the initial efficiency of PSCs | Aging time during which the films remain stable | Ref. |
|----------------------------------------------------|---------|-------------------------------------------------------|----------------------------------------------------------------------|-------------------------------------------------|------|
|                                                    |         | RH<30%                                                |                                                                      |                                                 |      |
| Polyethyleneimine (PEI) with multiple amino-groups | 15.48%  | Dark, RT, RH<20±5%                                    | 500 h / 81.9%                                                        |                                                 | S33  |
| Phenylethylammonium chlorine (PEACl)               | 14.05%  | Dark, RT, RH<60%                                      | 12 h / 80%                                                           |                                                 | S34  |
| CH <sub>3</sub> COOCs                              | 10.53%  | Dark, T=20 °C, RH ≈ 30%                               | ~475 h / ~60%                                                        |                                                 | S35  |
| Sm(AcAc) <sub>3</sub>                              | 12.85%  | Dark, T= 85 °C                                        | 200 h / 85%                                                          |                                                 | S36  |
| FeCl <sub>2</sub>                                  | 17.1%   | Light (100 mW/cm <sup>2</sup> ), RT, inert atmosphere | 420 h / 76%                                                          |                                                 | S37  |
| Eu(Ac) <sub>3</sub>                                | 15.25%  | Dark, room temperature, RH =35-40 %                   | 720 h / 80%                                                          |                                                 | S38  |
| Eu(Ac) <sub>3</sub>                                | 12.1%   | Dark, T=85°C, inert atmosphere<br>Dark, RT, RH=40%    | 200 h / 80%<br>500 h / 80%                                           |                                                 | S39  |
| SrI <sub>2</sub>                                   | 16.61%  | Dark, RT, ambient air                                 | 100 h / 85%                                                          |                                                 | S40  |
| BaI <sub>2</sub>                                   | 14.85 % | Dark, T=85°C, ambient air                             | 450 h / ~80%                                                         |                                                 | S41  |
| LaCl <sub>3</sub>                                  | 8.03%   | Dark, T=85°C, RT, ambient air                         | 450 h / ~80%                                                         |                                                 | S42  |
| Nb <sup>5+</sup>                                   | 10.42%  | -                                                     | -                                                                    | -                                               | S43  |
| InCl <sub>3</sub>                                  | 13.74%  | -                                                     | -                                                                    | -                                               | S44  |
| Nil <sub>2</sub>                                   | 15.88%  | Dark, RT, RH                                          | 550 h /                                                              |                                                 | S45  |

| Additive                                                                | PCE, % | Aging conditions                                                                          | Aging time / Retained fraction (%) of the initial efficiency of PSCs | Aging time during which the films remain stable | Ref. |
|-------------------------------------------------------------------------|--------|-------------------------------------------------------------------------------------------|----------------------------------------------------------------------|-------------------------------------------------|------|
|                                                                         |        | ~35 %                                                                                     | 70%                                                                  |                                                 |      |
| GeI <sub>2</sub>                                                        | 10.8 % | Dark, RT, RH ~30 %                                                                        | 7 h / ~100%                                                          |                                                 | S46  |
| YbI <sub>2</sub>                                                        | 14.04% | Dark, T=85°C, RH ~30 %                                                                    | 280 h / 85%                                                          |                                                 | S47  |
| CuBr <sub>2</sub>                                                       | 16.15% | -                                                                                         | -                                                                    |                                                 | S48  |
| MgCl <sub>2</sub>                                                       | 13.47% | Dark, T=25°C, RH ~25 %                                                                    | 840 h / ~95%                                                         |                                                 | S49  |
| CaCl <sub>2</sub>                                                       | 16.79% | Dark, T=85°C, room temperature, ambient air                                               | 1000 h / 90%                                                         |                                                 | S50  |
| CsBr                                                                    | 10.7%  | Light (100 mW/cm <sup>2</sup> ), T=60°C, inert atmosphere                                 | 500 h / ~70%                                                         | 1000 h                                          | S51  |
| CsBr                                                                    | 6.7%   | Dark, T=85°C, RH ~85 %                                                                    | 240 h / 90%                                                          |                                                 | S53  |
| Lewis base adducts PbI <sub>2</sub> (DMSO) and PbBr <sub>2</sub> (DMSO) | 14.78% | Dark, RT, RH ~20 %                                                                        | 500 h / ~95%                                                         |                                                 | S54  |
| Organic ligands armored ZnO                                             |        | Light (100 mW/cm <sup>2</sup> ), RT, ambient atmosphere<br>Dark, T=85°C, inert atmosphere | 200 h / ~90%<br>400 h / ~85%                                         |                                                 | S55  |

**Table S2.** The average and the best (in brackets) values of power conversion efficiency (*PCE*), open-circuit voltage ( $V_{OC}$ ), short-circuit current density ( $J_{SC}$ ), and fill factor (*FF*) of the devices with different **Asn** loadings.\*

| <b>Asn loading, %</b> | <b><math>V_{OC}</math>, V</b> | <b><math>J_{SC}</math>, mA cm<sup>-2</sup></b> | <b><i>FF</i>, %</b>  | <b>PCE, %</b>        |
|-----------------------|-------------------------------|------------------------------------------------|----------------------|----------------------|
| 0                     | (1.136)<br>1.100 ± 0.036      | (14.4)<br>13.9 ± 0.5                           | (71.0)<br>63.3 ± 6.7 | (11.6)<br>9.7 ± 1.8  |
| 0.5                   | (1.115)<br>1.096 ± 0.018      | (14.4)<br>13.7 ± 0.6                           | (75.2)<br>68.1 ± 6.9 | (12.1)<br>10.2 ± 1.7 |
| 1.0                   | (1.089)<br>1.070 ± 0.019      | (13.5)<br>12.9 ± 0.6                           | (71.3)<br>68.0 ± 3.3 | (10.5)<br>9.4 ± 1.1  |
| 2.0                   | (1.074)<br>1.012 ± 0.061      | (12.8)<br>12.1 ± 0.8                           | (66.3)<br>58.3 ± 7.8 | (9.1)<br>7.1 ± 2.0   |

**Notes:** \* *J*–*V* curves were measured in forward directions with a scan rate of 0.01 V/s

## References

- S1. A. Wang, X. Deng, J. Wang, S. Wang, X. Niu, F. Hao and L. Ding, *Nano Energy*, 2021, **81**, 105631.
- S2. F. Hong, Y. Li, W. Xiang, X. Liu, Z. Jiang, Z. Ma and F. Xu, *Chem. Lett.*, 2021, **50**, 1500–1503.
- S3. J. He, J. Su, Z. Lin, J. Ma, L. Zhou, S. Zhang, S. Liu, J. Chang and Y. Hao, *Adv. Sci.*, 2021, **8**, 2101367.
- S4. C.-L. Chen, S.-S. Zhang, T.-L. Liu, S.-H. Wu, Z.-C. Yang, W.-T. Chen, R. Chen and W. Chen, *Rare Metals*, 2020, **39**, 131–138.
- S5. S. Fu, J. Wang, X. Liu, H. Yuan, Z. Xu, Y. Long, J. Zhang, L. Huang, Z. Hu and Y. Zhu, *Chem. Eng. J.*, 2021, 422, 130572.
- S6. I. Poli, S. Eslava and P. Cameron, *J. Mater. Chem. A*, 2017, **5**, 22325–22333.
- S7. Y. Wang, T. Zhang, F. Xu, Y. Li and Y. Zhao, *Solar RRL*, 2018, **2**, 1700180.
- S8. M. Chen, S. R. Sahamir, G. Kapil, A. K. Baranwal, M. A. Kamarudin, Y. Zhang, K. Nishimura, C. Ding, D. Liu, D. Hirotsani, Q. Shen and S. Hayase, *Sol. Energy Mater. Sol. Cells*, 2020, **218**, 110741.
- S9. J. Zhang, Z. Jin, L. Liang, H. Wang, D. Bai, H. Bian, K. Wang, Q. Wang, N. Yuan, J. Ding and S. F. Liu, *Adv. Sci.*, 2018, **5**, 1801123.
- S10. I. S. Jin, B. Parida and J. W. Jung, *J. Mater. Sci. Technol.*, 2022, **102**, 224–231.
- S11. W. Liu, M. Cao, J. Zhang, J. Jiang, H. Yu, X. Hao, J. Zhang, H. Guo, B. Fang, N. Yuan, X. Fan, S. Zhang and J. Ding, *Journal of Power Sources*, 2022, **530**, 231294.
- S12. C. Duan, J. Li, Z. Liu, Q. Wen, H. Tang and K. Yan, *Chem. Eng. J.*, 2021, **417**, 128053.
- S13. H. Liu, X. Xiao, Z. Bi, J. Wang, Y. Liu, Y. Zhu, X. Xu and G. Xu, *Solar Energy*, 2020, **195**, 544–551.
- S14. Y. Chung, K. S. Kim and J. W. Jung, *Int. J. Energy Res.*, 2022, **46**, 6012–6021.
- S15. Z. Wang, A. K. Baranwal, M. Akmal kamarudin, P. Zhang, G. Kapil, T. Ma and S. Hayase, *Nano Energy*, 2019, **66**, 104180.
- S16. Z. Li, W. Wu, G. Ren, W. Han, N. Li, C. Liu and W. Guo, *Solar RRL*, 2021, **5**, 2100347.

- S17. J. Zhuang, Y. Wei, Y. Luan, N. Chen, P. Mao, S. Cao and J. Wang, *Nanoscale*, 2019, **11**, 14553–14560.
- S18. Z. Zeng, J. Zhang, X. Gan, H. Sun, M. Shang, D. Hou, C. Lu, R. Chen, Y. Zhu and L. Han, *Adv. Energy Mater.*, 2018, **8**, 1801050.
- S19. S. Öz, A. K. Jena, A. Kulkarni, K. Mouri, T. Yokoyama, I. Takeji, F. Ünlü, S. Mathur and T. Miyasaka, *ACS Energy Letters*, 2020, **5**, 1292–1299.
- S20. A. Wang, J. Wang, X. Niu, C. Zuo, F. Hao and L. Ding, *InfoMat*, 2021, **4**, e12263.
- S21. J. Ma, Z. Lin, X. Guo, L. Zhou, J. He, Z. Yang, J. Zhang, Y. Hao, S. Liu and J. Chang, *J. Energy Chem.*, 2021, **63**, 558–565.
- S22. H. Li, X. Hao, B. Chang, Z. Li, L. Wang, L. Pan, X. Chen and L. Yin, *ACS Appl. Mater. Interfaces*, 2021, **13**, 40489–40501.
- S23. J. Wang, S. Fu, X. Liu, H. Yuan, Z. Xu, C. Wang, J. Zhang, L. Huang, Z. Hu and Y. Zhu, *J. Alloys Compd.*, 2022, **891**, 161971.
- S24. K. Zheng, J. Ge, C. Liu, Q. Lou, X. Chen, Y. Meng, X. Yin, S. Bu, C. Liu and Z. Ge, *InfoMat*, 2021, **3**, 1431–1444.
- S25. T. Zhang, H. Li, S. Liu, X. Wang, X. Gong, Q. Sun, Y. Shen and M. Wang, *J. Phys. Chem. Lett.*, 2019, **10**, 200–205.
- S26. X.-M. Liu, Y.-H. Li, X.-T. Wang, Y.-X. Zhao and School of Environmental Science and Engineering, Shanghai Jiao Tong University, Shanghai 200240, China, *Acta. Phys. Sin.*, 2019, **68**, 158805.
- S27. J. Wang, L. Chen, Z. Qian, G. Ren, J. Wu and H. Zhang, *J. Mater. Chem. A*, 2020, **8**, 25336–25344.
- S28. B. Yuan, C. Li, W. Yi, F. Juan, H. Yu, F. Xu, C. Li and B. Cao, *J. Phys. Chem. Solids*, 2021, **153**, 110000.
- S29. J. Wei, X. Wang, X. Sun, Z. Yang, I. Moreels, K. Xu and H. Li, *Nano Research*, 2020, **13**, 684–690.
- S30. C. Zhang, X. Wan, J. Zang, Q. Liu, Y. Fei and Z. Yu, *Surf. Interfaces.*, 2021, **22**, 100809.
- S31. S. Ullah, P. Yang, J. Wang, L. Liu, S.-E. Yang, T. Xia and Y. Chen, *J. Solid State Chem.*, 2022, **305**, 122656.



- S32. H. Zhao, S. Yang, Y. Han, S. Yuan, H. Jiang, C. Duan, Z. Liu and S. (Frank) Liu, *Adv. Mater. Technol.*, 2019, **4**, 1900311.
- S33. H. Peng, M. Cai, J. Zhou, Y. Yang, X. Ding, Y. Tao, G. Wu, X. Liu, J. H. Pan and S. Dai, *Solar RRL*, 2020, **4**, 2000216.
- S34. H. Wang, H. Bian, Z. Jin, L. Liang, D. Bai, Q. Wang and S. F. Liu, *Solar RRL*, 2018, **2**, 1800216.
- S35. L. Yu, J. Zhang, H. Yuan, H. Sun, X. Gan, Z. Hu and Y. Zhu, *ACS Appl. Energy Mater.*, 2020, **3**, 1076–1081.
- S36. J. V. Patil, S. S. Mali and C. K. Hong, *ACS Sustain. Chem. Eng.*, 2020, **8**, 16364–16371.
- S37. J. Tian, J. Wang, Q. Xue, T. Niu, L. Yan, Z. Zhu, N. Li, C. J. Brabec, H. Yip and Y. Cao, *Adv. Funct. Mater.*, 2020, **30**, 2001764.
- S38. S. Yang, H. Zhao, Y. Han, C. Duan, Z. Liu and S. (Frank) Liu, *Small*, 2019, **15**, 1904387.
- S39. L. Chen, W. Wu, J. Wang, Z. Qian, R. Liu, Y. Niu, Y. Chen, X. Xie and H. Zhang, *ACS Appl. Energy Mater.*, 2021, **4**, 3937–3944.
- S40. J. V. Patil, S. S. Mali and C. K. Hong, *J. Energy Chem.*, 2021, **62**, 451–458.
- S41. S. S. Mali, J. V. Patil and C. K. Hong, *Nano Letters*, 2019, **19**, 6213–6220.
- S42. S. Chen, T. Zhang, X. Liu, J. Qiao, L. Peng, J. Wang, Y. Liu, T. Yang and J. Lin, *J. Mater. Chem. C*, 2020, **8**, 3351–3358.
- S43. Z. Guo, S. Zhao, A. Liu, Y. Kamata, S. Teo, S. Yang, Z. Xu, S. Hayase and T. Ma, *ACS Appl. Mater. Interfaces*, 2019, **11**, 19994–20003.
- S44. C. Liu, W. Li, H. Li, H. Wang, C. Zhang, Y. Yang, X. Gao, Q. Xue, H.-L. Yip, J. Fan, R. E. I. Schropp and Y. Mai, *Adv. Energy Mater.*, 2019, **9**, 1803572.
- S45. H. Zhao, Z. Xu, Y. Che, Y. Han, S. Yang, C. Duan, J. Cui, S. Dai, Z. Liu and S. (Frank) Liu, *J. Power Sources*, 2021, **492**, 229580.
- S46. F. Yang, D. Hirotsu, G. Kapil, M. A. Kamarudin, C. H. Ng, Y. Zhang, Q. Shen and S. Hayase, *Angew. Chem. Int. Ed.*, 2018, **57**, 12745–12749.
- S47. J. V. Patil, S. S. Mali, D. W. Park and C. K. Hong, *Mater. Today Chem.*, 2021, **22**, 100557.
- S48. K.-L. Wang, R. Wang, Z.-K. Wang, M. Li, Y. Zhang, H. Ma, L.-S. Liao and Y. Yang, *Nano Letters*, 2019, **19**, 5176–5184.

- S49. D. Bai, J. Zhang, Z. Jin, H. Bian, K. Wang, H. Wang, L. Liang, Q. Wang and S. F. Liu, *ACS Energy Letters*, 2018, **3**, 970–978.
- S50. Y. Han, H. Zhao, C. Duan, S. Yang, Z. Yang, Z. Liu and S. (Frank) Liu, *Adv. Funct. Mater.*, 2020, **30**, 1909972.
- S51. L. A. Frolova, Q. Chang, S. Y. Luchkin, D. Zhao, A. F. Akbulatov, N. N. Dremova, A. V. Ivanov, E. E. M. Chia, K. J. Stevenson and P. A. Troshin, *J. Mater.s Chem. C*, 2019, **7**, 5314–5323.
- S52. Q. Ma, S. Huang, S. Chen, M. Zhang, C. F. J. Lau, M. N. Lockrey, H. K. Mulmudi, Y. Shan, J. Yao, J. Zheng, X. Deng, K. Catchpole, M. A. Green and A. W. Y. Ho-Baillie, *J. Phys. Chem. C*, 2017, **121**, 19642–19649
- S54. G. Yin, H. Zhao, H. Jiang, S. Yuan, T. Niu, K. Zhao, Z. Liu and S. F. Liu, *Adv. Funct. Mater.*, 2018, **28**, 1803269
- S55. P. Wang, H. Wang, Y. Mao, H. Zhang, F. Ye, D. Liu and T. Wang, *Adv. Sci.*, 2020, **7**, 2000421.
